# Supplementary material for: Synthesis and characterization of novel sulfanilic acid–polyvinyl chloride–polysulfone blend membranes for metal ion rejection
Source: Royal Society of Chemistry journal article supplement (doi:10.1039/c6ra02590k), 2016-01-01
Supplement: c6ra02590k1.pdf [file c6ra02590k1.pdf]

1 Supporting information

2

3

4

5

6

7

8

9

10

11

12

13

14

15

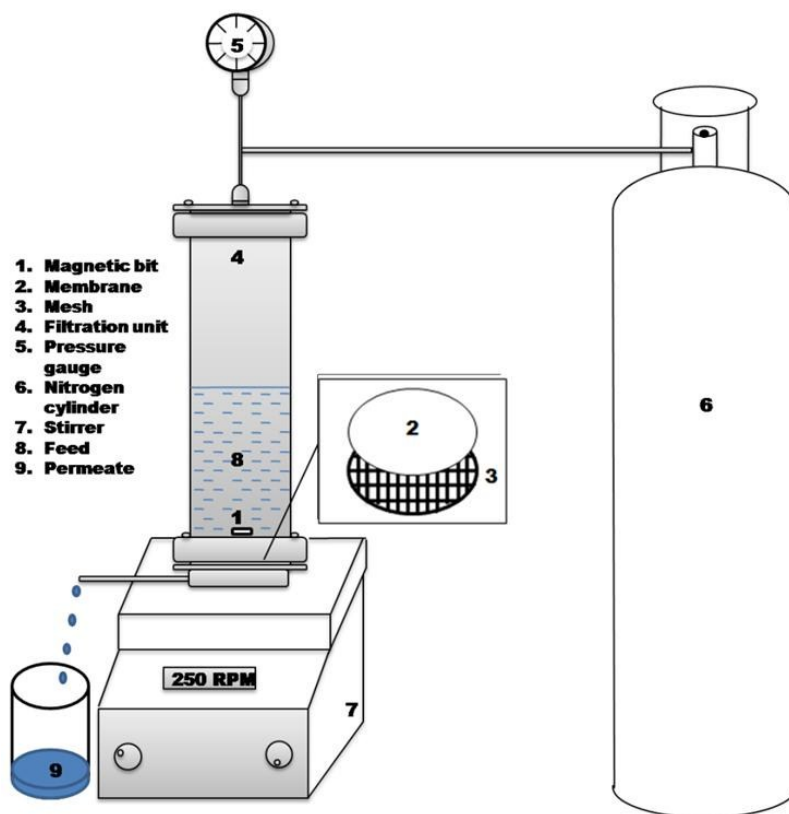

16

S.1. Experimental set up for the rejection of metal ions.

17

18

19

20

21

22

23

24

25

26  
27  
28  
29  
30  
31  
32  
33  
34  
35  
36  
37  
38  
39  
40  
41  
42  
43  
44  
45  
46  
47  
48  
49  
50

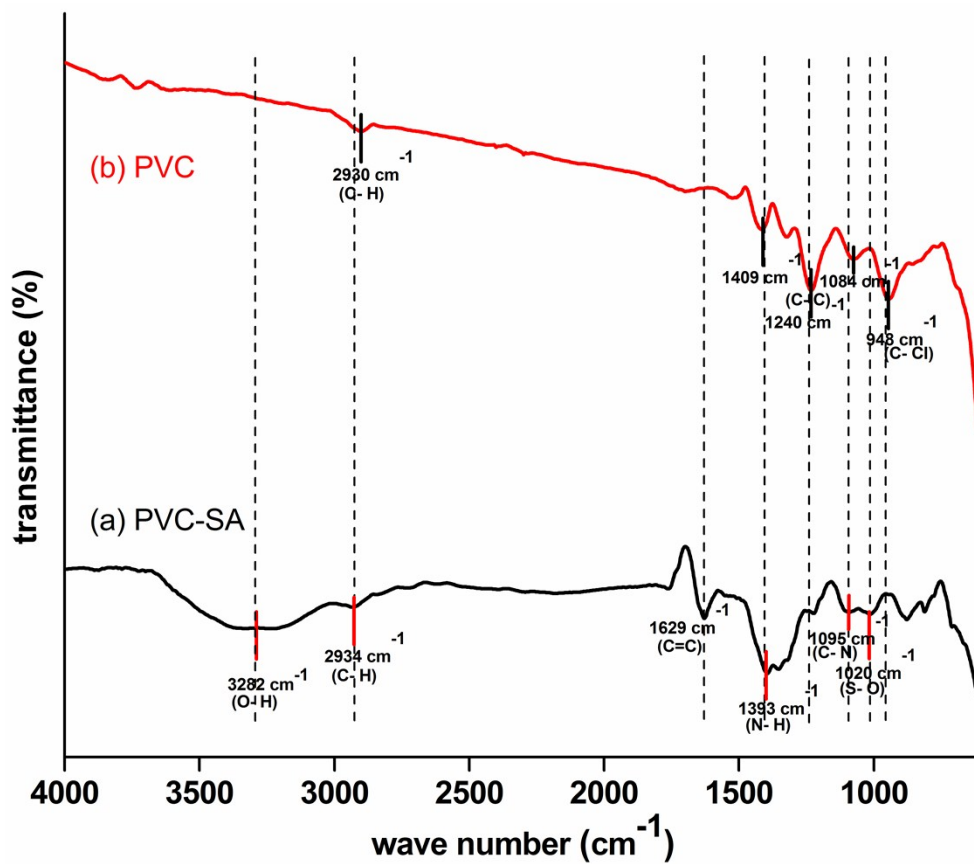

S.2. ATR-IR spectrum of PVC modified with sulfanilic acid.

51

52

53

54

55

56

57

58

59

60

61

62

63

64

65

66

67

68

69

70

71

72

73

74

75

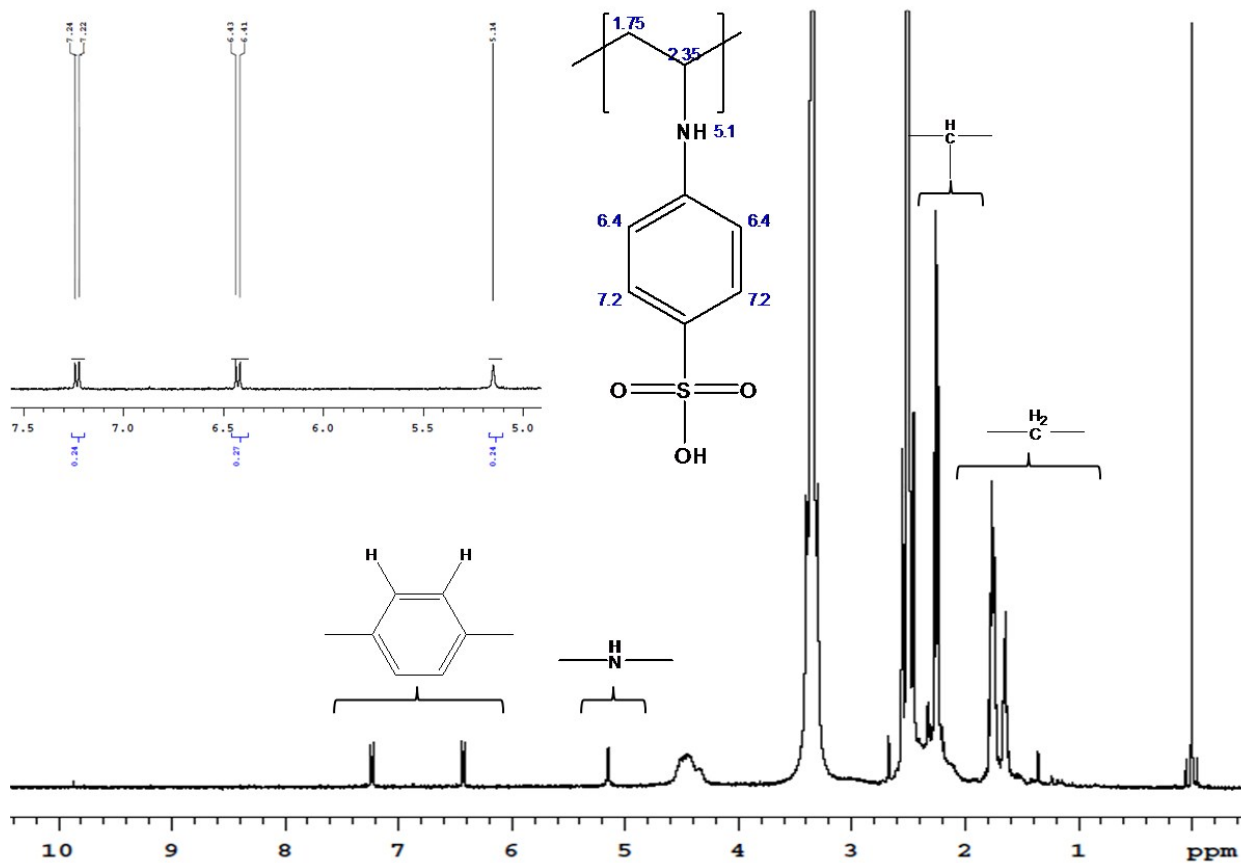

S.3. <sup>1</sup>H NMR spectrum of PVC modified with sulfanilic acid.

76  
77  
78  
79  
80  
81  
82  
83  
84  
85  
86  
87  
88  
89  
90  
91  
92  
93  
94  
95  
96  
97  
98  
99  
100

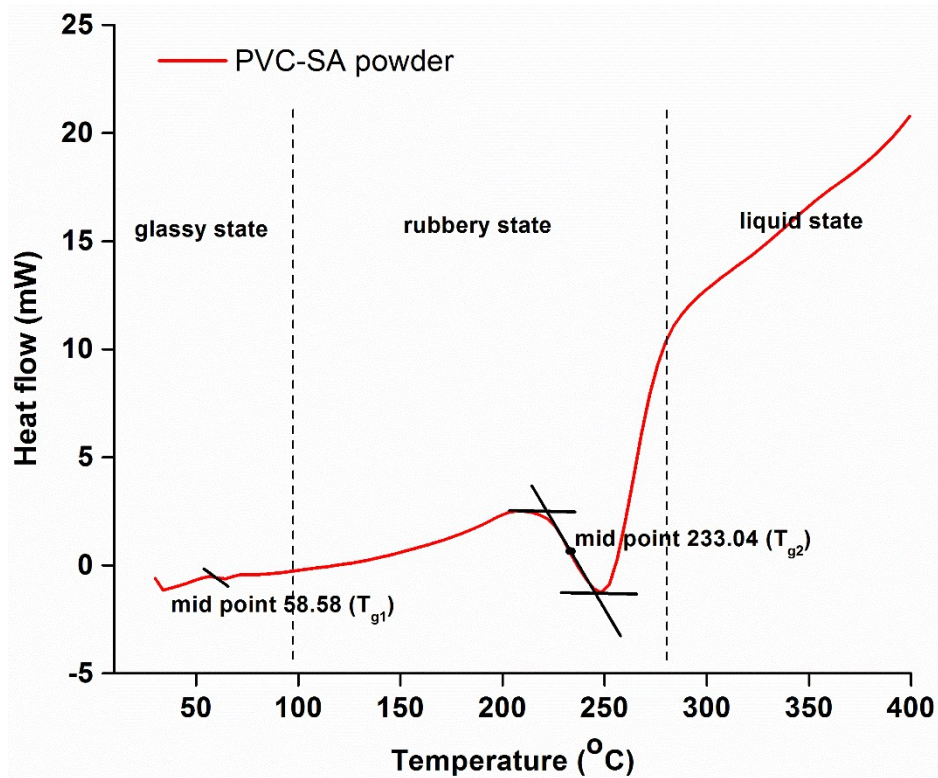

S.4. DSC plot of PVC-SA.

101  
102  
103  
104  
105  
106  
107  
108  
109  
110  
111  
112  
113  
114  
115  
116  
117  
118  
119  
120  
121  
122  
123  
124  
125

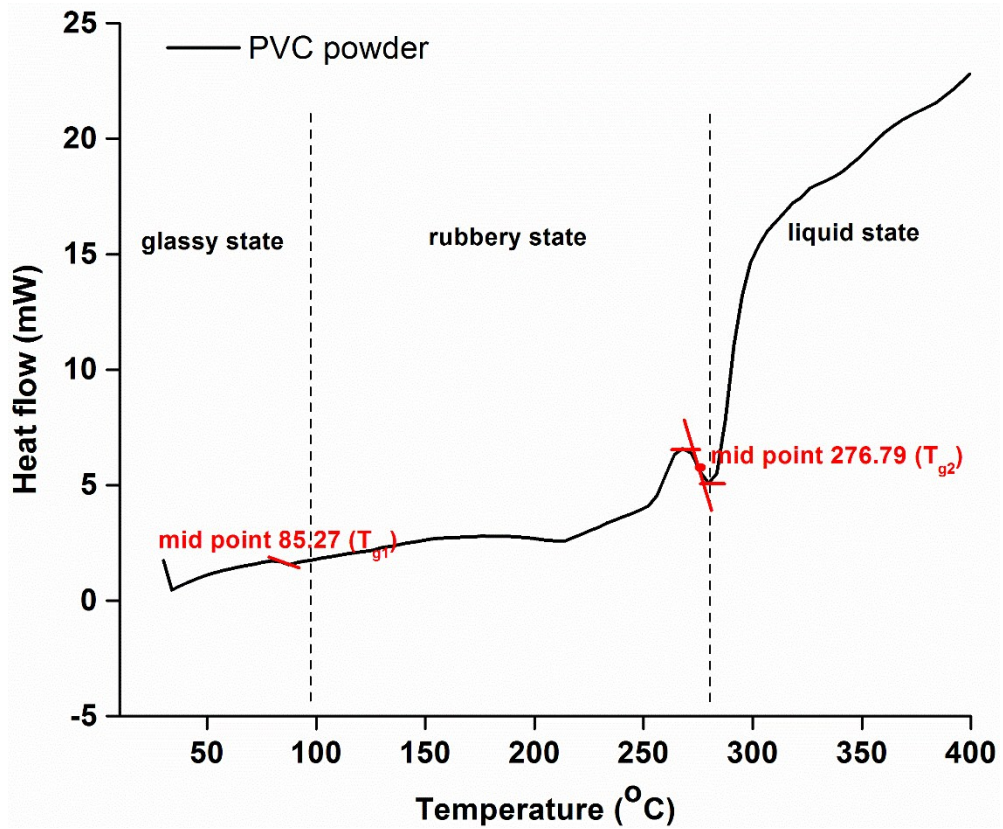

S.5. DSC plot of PVC.

126  
127  
128  
129  
130  
131  
132  
133  
134  
135  
136  
137  
138  
139  
140  
141  
142  
143  
144  
145  
146  
147  
148  
149  
150

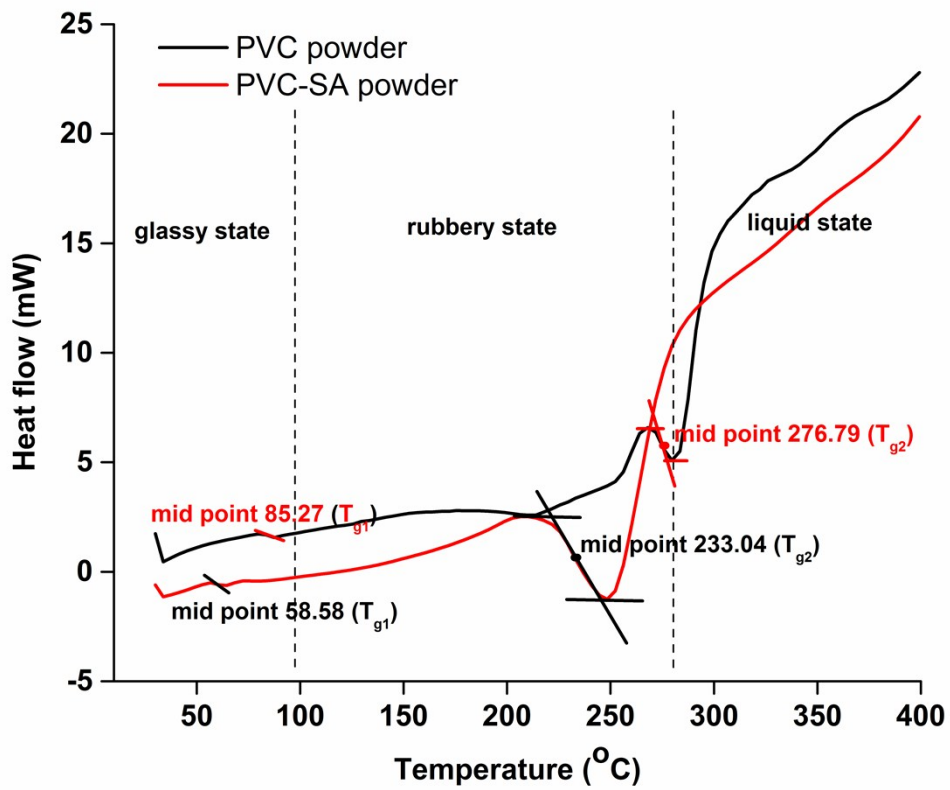

S.6. DSC plot of PVC and PVC-SA together for comparison.

151

152

153

154

155

156

157

158

159

160

161

162

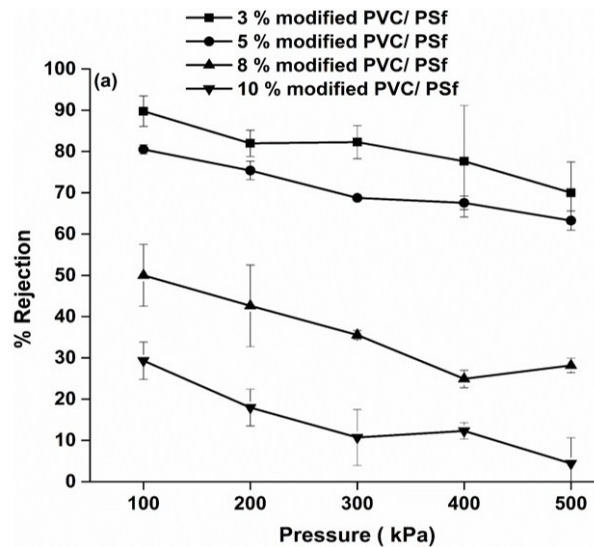

163

164

165

166

167

168

169

170

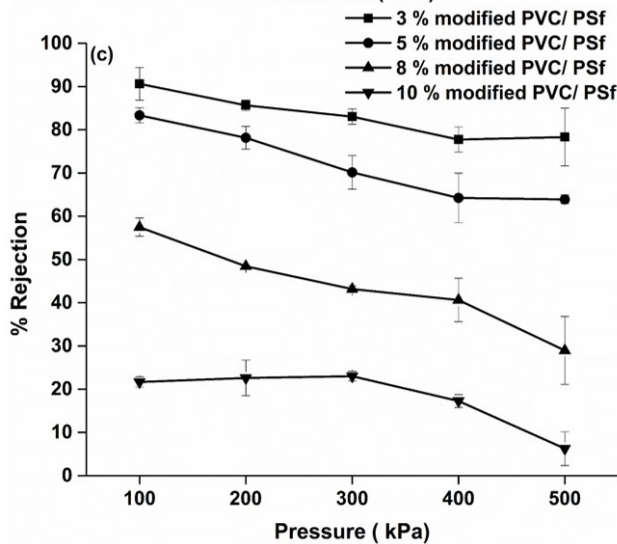

171 S.7 % Rejection of metal ions (a) Cadmium (b) Chromium and (c) Lead using blend membranes

172

and (d) represents the rejection of all three metal ions by NF 270 membrane.

173

174

175

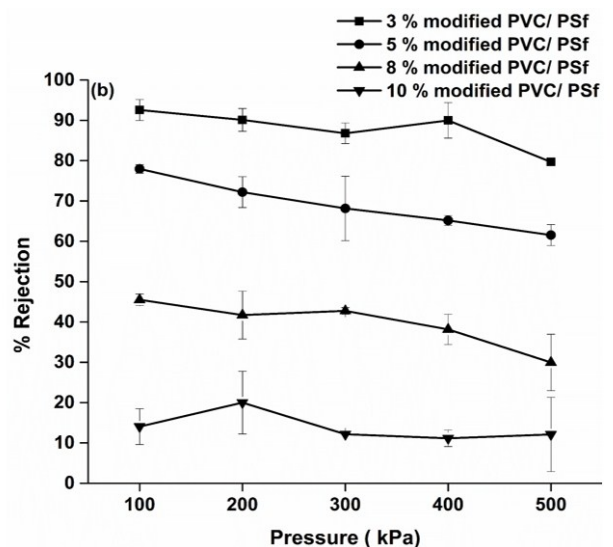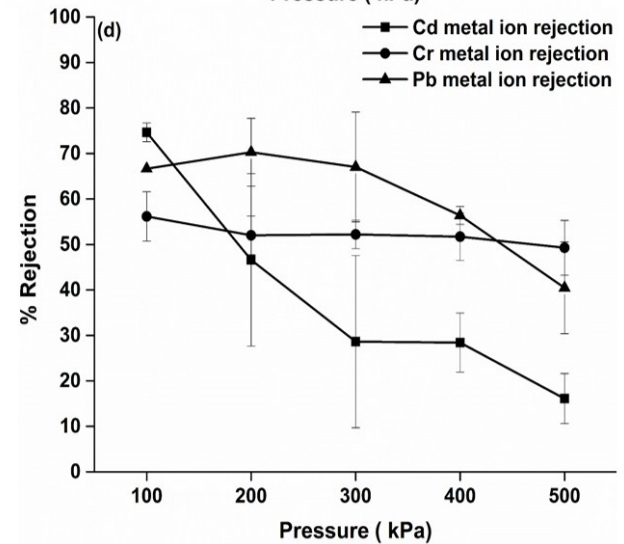

176

177

178

179

180

181

182

183

184

185

186

187

188

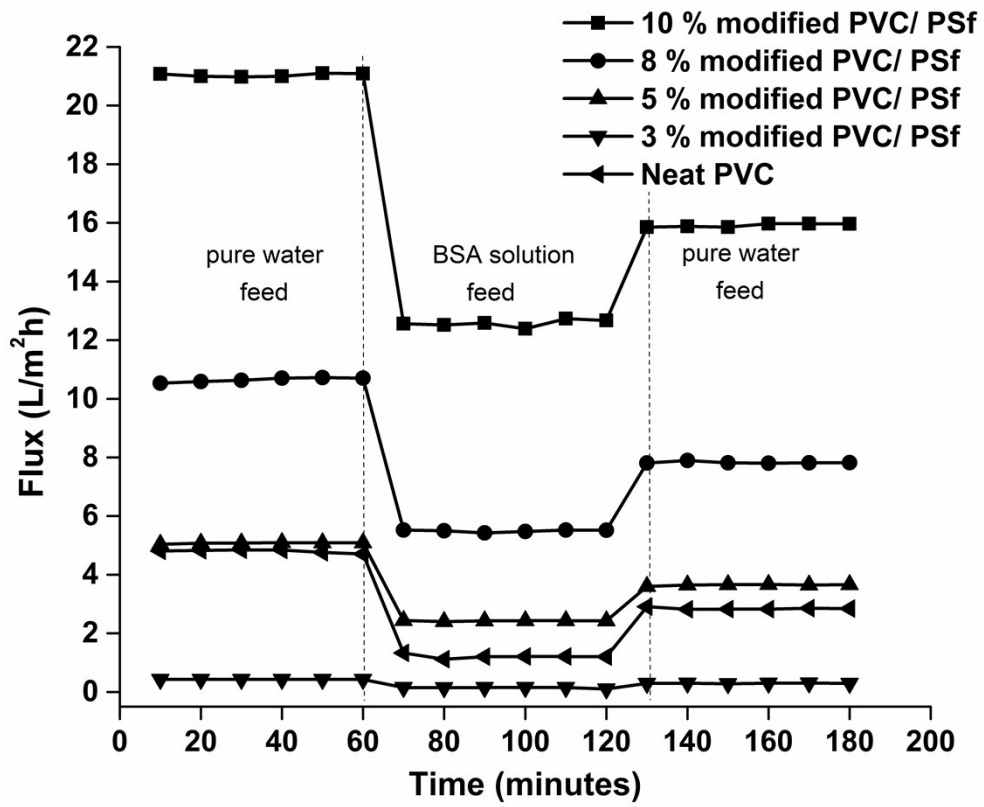

189

S.8. Antifouling study of the membranes at constant interval of time.

190

191

192

193

194

195

196

197

198

199

200

201



202

203

204

205

206

207

208

209

210

211

212

213

214

215

216

217

218

219

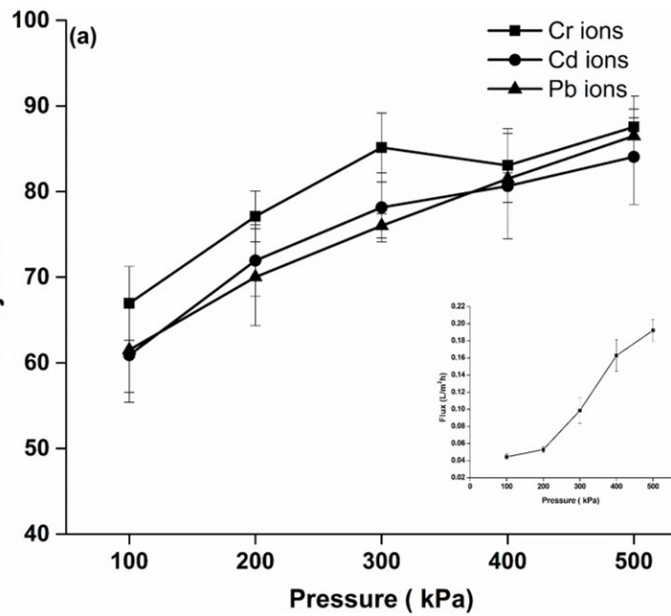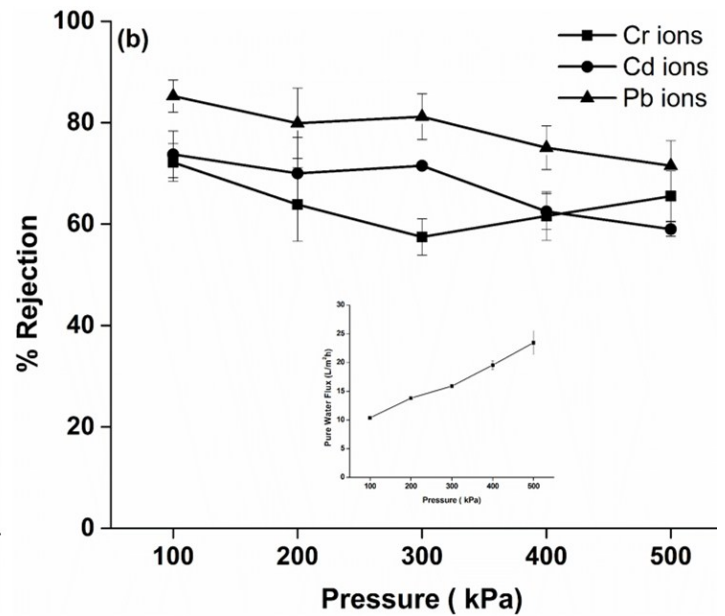

S.9. % Rejection of Cadmium, Chromium and Lead metal ions together at different pressure by (a) 3 % PVC-SA/PSf membrane and (b) NF 270 membrane.
